# Supplementary material for: Understanding the different effects of fouling mechanisms on working and reference electrodes in fast-scan cyclic voltammetry for neurotransmitter detection
Source: Royal Society of Chemistry journal article supplement (doi:10.1039/d3an02205f), 2024-01-01
Supplement: d3an02205f2.pdf [file d3an02205f2.pdf]

Supplementary Figure

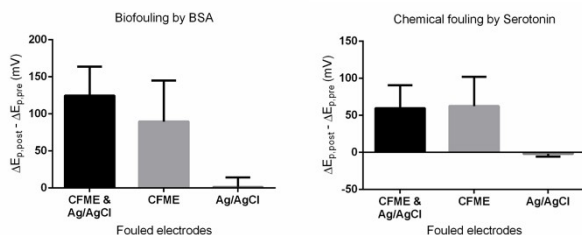

Figure S1. The  $\Delta E_p$  difference after fouling by (a) BSA and (b) serotonin for both CFME and Ag/AgCl electrodes fouled, for only CFME fouled, and for only Ag/AgCl electrode fouled.

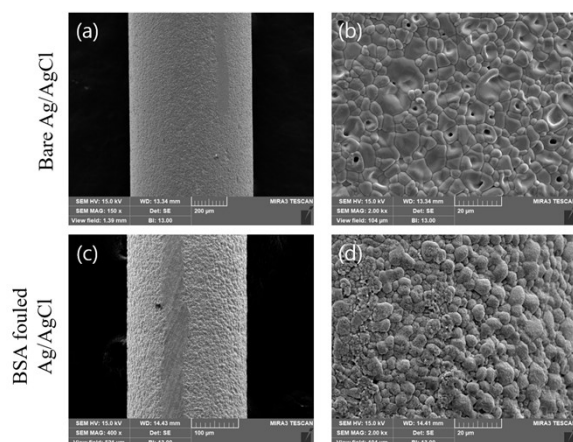

Figure S2. (a) 150x and (b) 2000x SEM images of bare Ag/AgCl reference electrode before implantation. (c) 400x and (d) 2000x SEM images of Ag/AgCl reference electrode after in-vitro fouling by BSA.

(a) Background subtracted voltammograms for dopamine detection

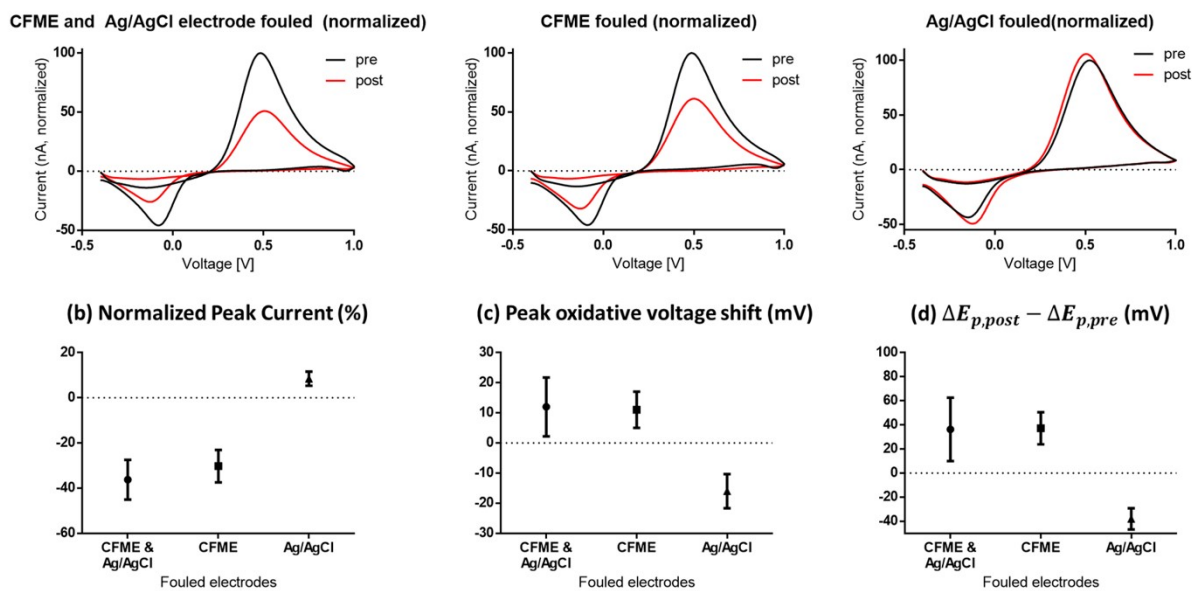

Fig S3. (a) Representative in vitro FSCV background-subtracted voltammograms using  $1\mu\text{M}$  dopamine before and after fouling the electrodes by F12-K for both CFME and Ag/AgCl electrode fouled, only CFME fouled, and only Ag/AgCl electrode fouled. (b) Normalized peak current decrease after fouling (Mean  $\pm$  SD;  $n=4$ ). (c) Peak voltage shift after fouling. (Mean  $\pm$  SD;  $n=4$ ). (d) The difference between  $\Delta E_p$  before and after fouling (Mean  $\pm$  SD;  $n=4$ ).

**(a) Background subtracted voltammograms for dopamine detection**

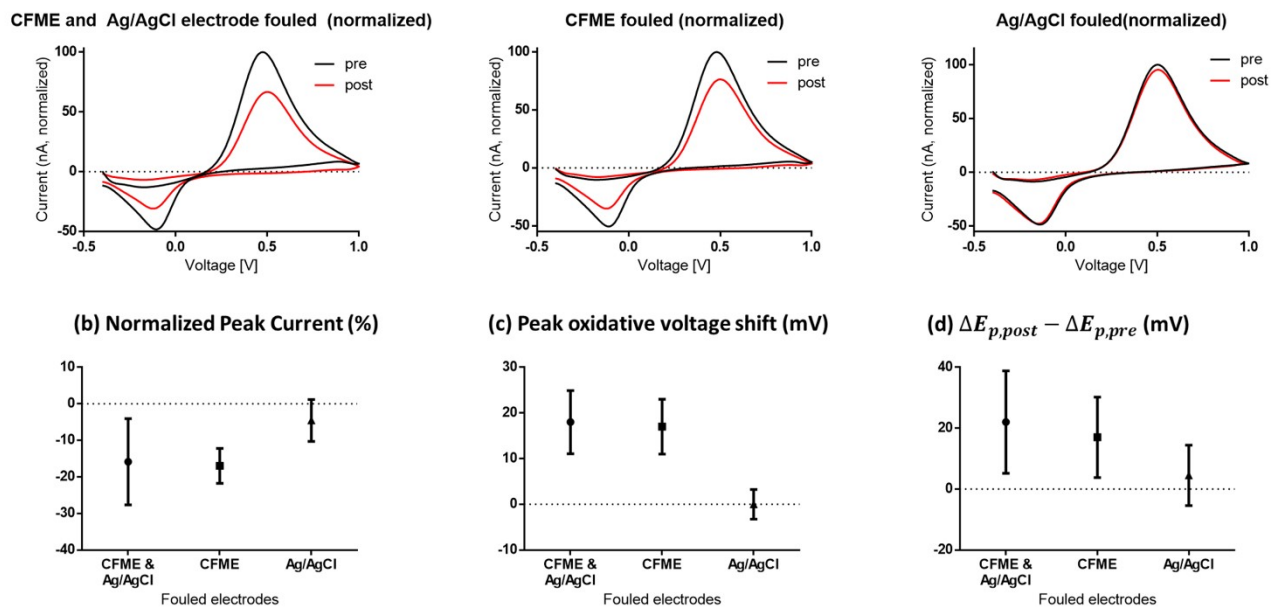

Fig S4. (a) Representative in vitro FSCV background-subtracted voltammograms using  $1\mu\text{M}$  dopamine before and after fouling the electrodes by  $1\text{mM}$  dopamine for both CFME and Ag/AgCl electrode fouled, only CFME fouled, and only Ag/AgCl electrode fouled. (b) Normalized peak current decrease after fouling (Mean  $\pm$  SD;  $n=4$ ). (c) Peak voltage shift after fouling. (Mean  $\pm$  SD;  $n=4$ ). (d) The difference between  $\Delta E_p$  before and after fouling (Mean  $\pm$  SD;  $n=4$ ).
