# Supplementary material for: Understanding the different effects of fouling mechanisms on working and reference electrodes in fast-scan cyclic voltammetry for neurotransmitter detection
Source: Royal Society of Chemistry journal article supplement (doi:10.1039/d3an02205f), 2024-01-01

(a) Background subtracted voltammograms for dopamine detection

CFME and Ag/AgCl electrode fouled (normalized)

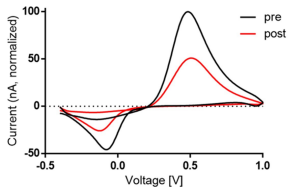

CFME fouled (normalized)

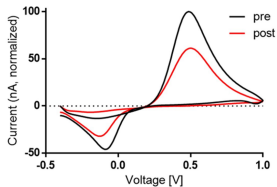

Ag/AgCl fouled(normalized)

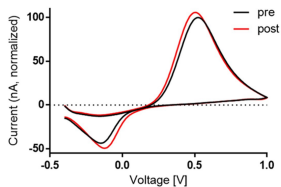

(b) Normalized Peak Current (%)

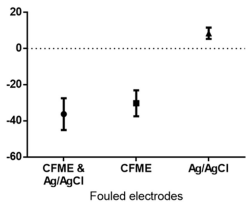

(c) Peak oxidative voltage shift (mV)

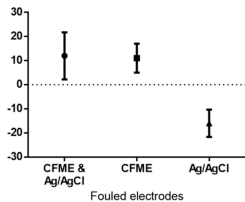

(d)  $\Delta E_{p,post} - \Delta E_{p,pre}$  (mV)

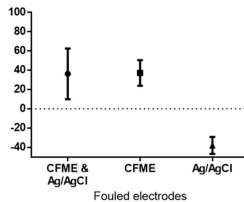

Supplement: d3an02205f5.pdf [file d3an02205f5.pdf]
