# Supplementary figures and images for: Understanding the different effects of fouling mechanisms on working and reference electrodes in fast-scan cyclic voltammetry for neurotransmitter detection
Source: Royal Society of Chemistry journal article supplement (doi:10.1039/d3an02205f), 2024-01-01

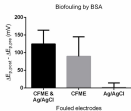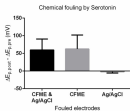

Supplement: d3an02205f3.pdf [file d3an02205f3.pdf]

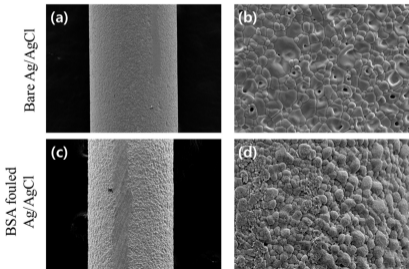

Supplement: d3an02205f4.pdf [file d3an02205f4.pdf]
